# Supplementary material
Source: Springer Nature journal article supplement (https://www.springermedizin.de/resource/supplementary/12877_2009_159_MOESM1_ESM.pdf/9441294)
Supplement: MOESM1 [file 9441294]

# Randomised controlled trial component

214 patients with mild to moderate severity  
Alzheimer's disease meeting inclusion criteria

Baseline balance / mobility assessment

randomisation

## Longitudinal balance component

64 age and gender  
matched healthy Ss  
(matched to first 64  
control group Ss)

Re-assessment (12 mths)

Re-assessment (18 mths)

Re-assessment (24 mths)

Control group (routine care and  
activity / information home visits  
by an Occupational Therapist)

Intervention group (home based  
balance training programme)

6 months  
Re-assessment after intervention / control  
programme

12 months  
Re-assessment 6 months after programme  
ceased

18 months

24 months

First 64 control participants -  
re-assessment

Focus group  
of exercise  
participants  
/ carers
